# Supplementary material
Source: PubMed Central journal article supplement (PMC2707832)

# Supplementary Figure S1

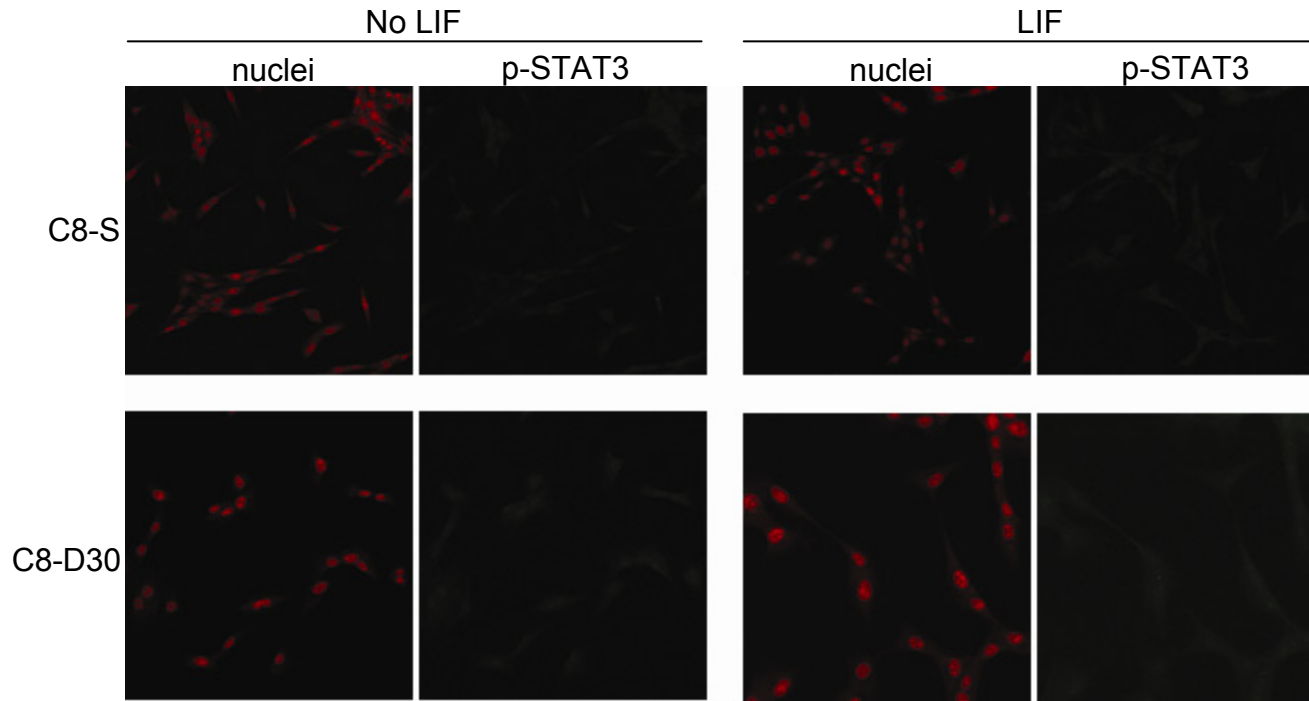

## Supplementary Figure S2

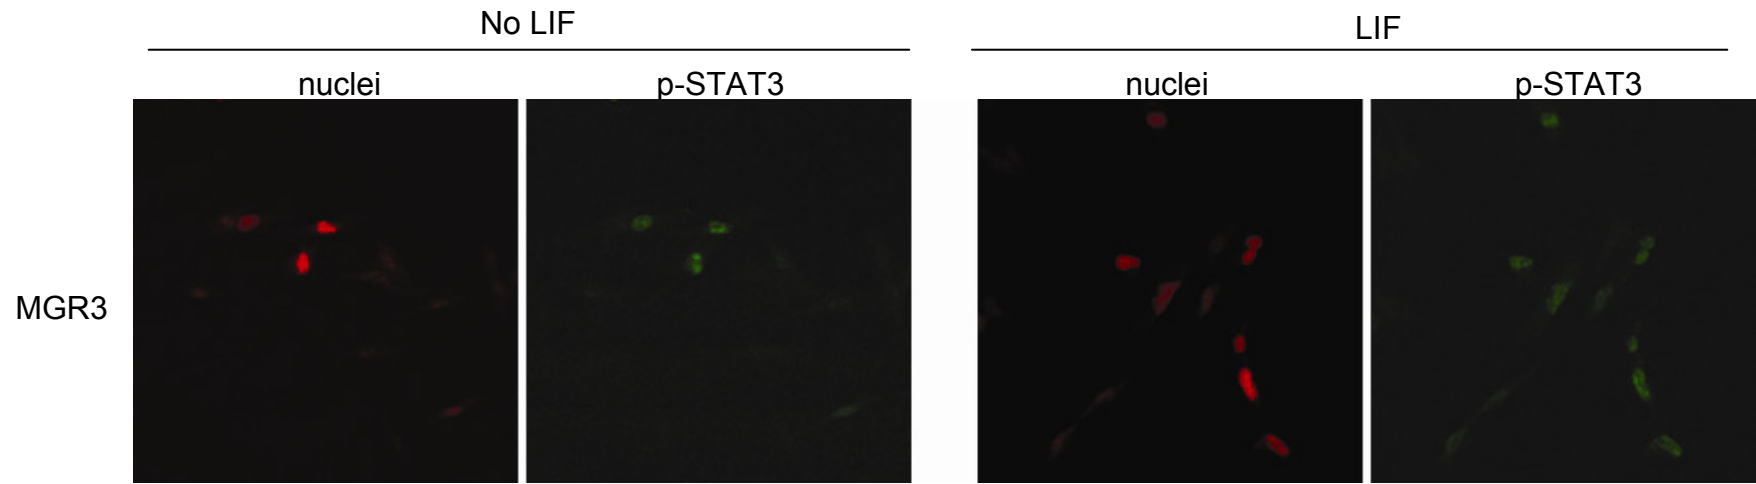

### Supplementary Figure S3

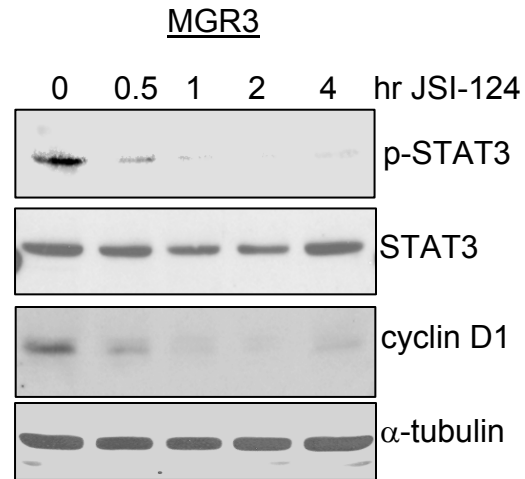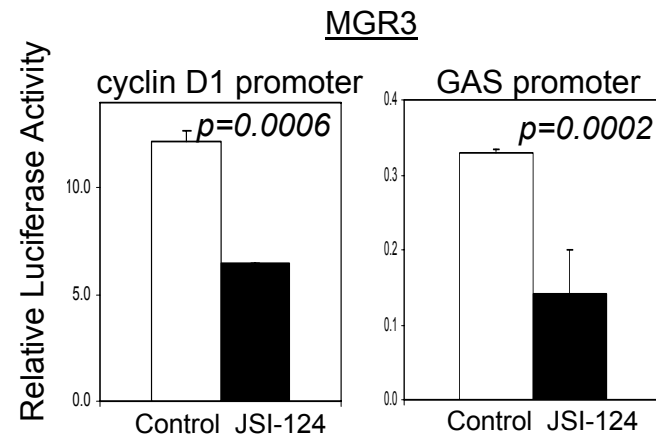

### Supplementary Figure S4

**A**

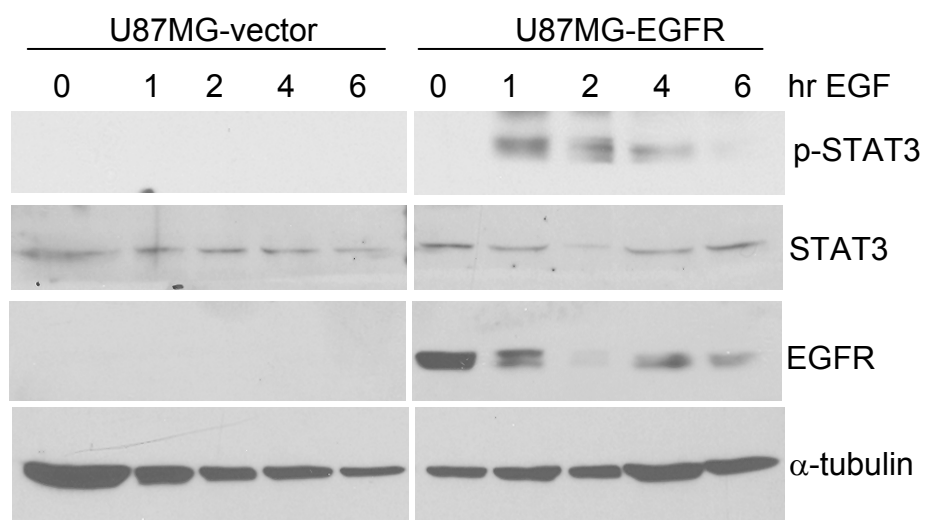

**B**

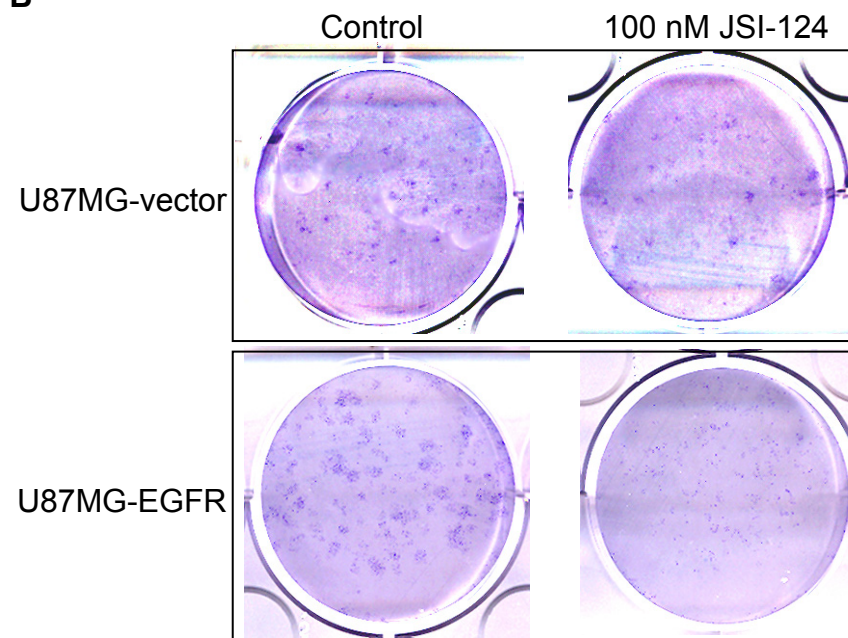

## Supplementary Figure S5

**A**

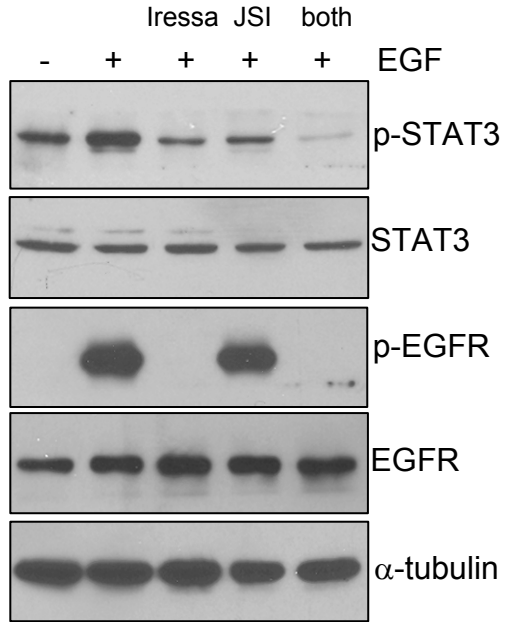

**B**

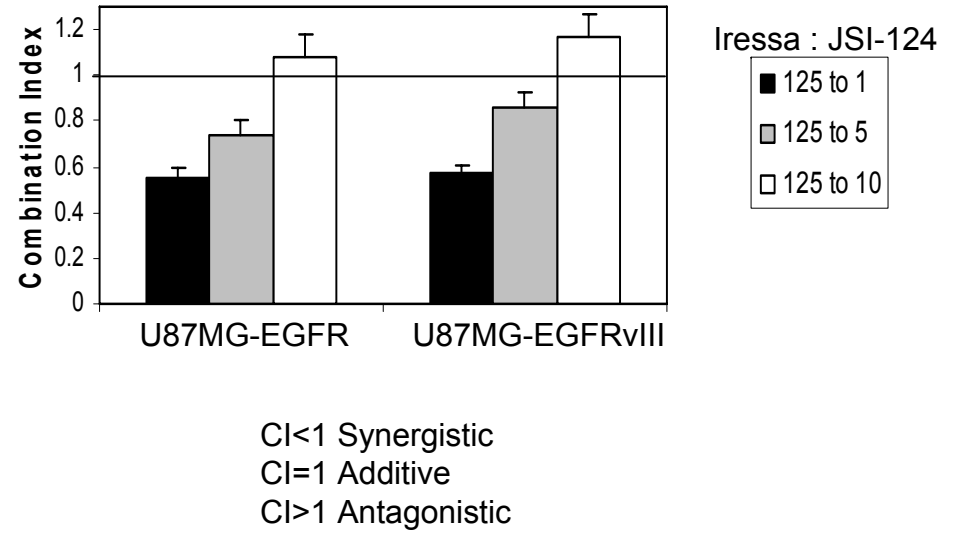

Supplementary Figure S6

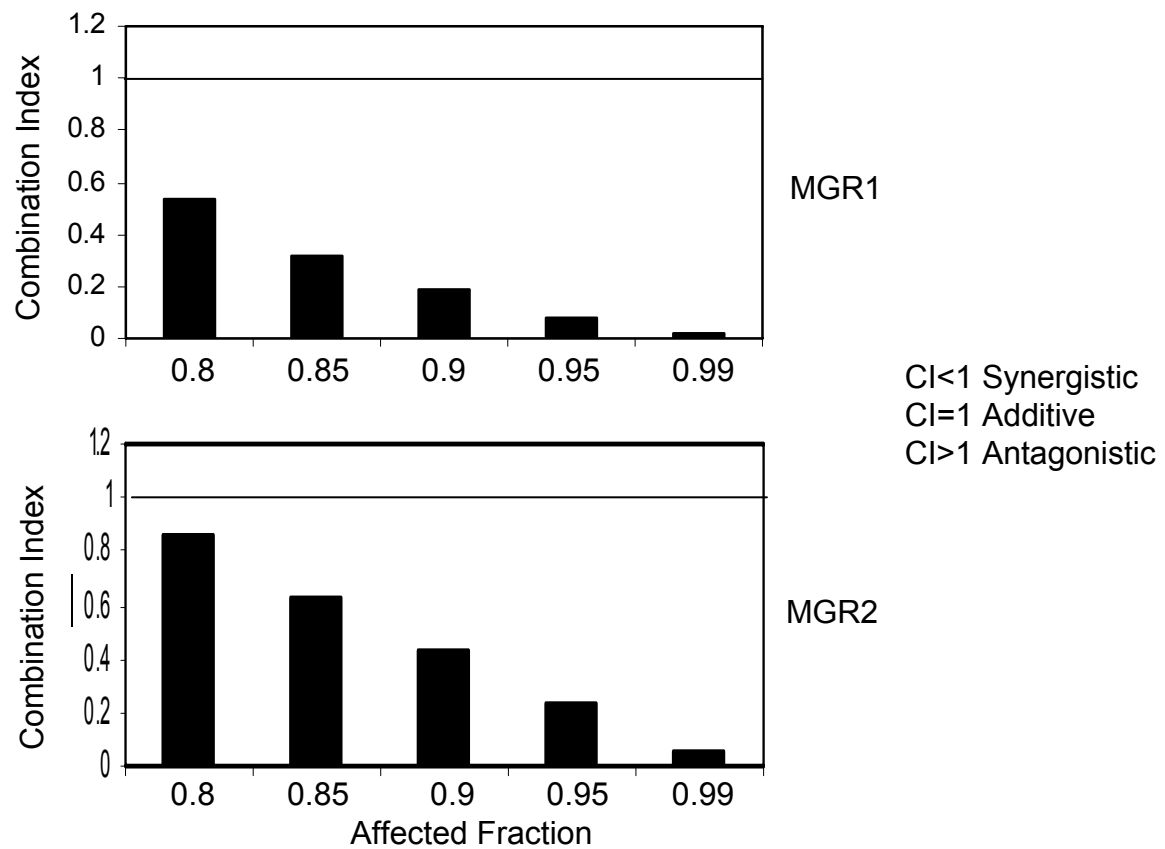

Supplement: NIHMS73039-supplement-Supplementary_Data.pdf [file NIHMS73039-supplement-Supplementary_Data.pdf]
